# Supplementary material for: Human serum and platelet lysate are appropriate xeno-free alternatives for clinical-grade production of human MuStem cell batches
Source: PubMed Central journal article supplement (PMC5932844; doi:10.1186/s13287-018-0852-y), 2018-05-02
Supplement: 13287_2018_852_MOESM1_ESM.pdf [file 13287_2018_852_MOESM1_ESM.pdf]

**Table S1. List of antibodies used for hMuStem cell characterization by flow cytometry analysis**

| Primary antibody          | Compagny and reference | Corresponding isotype |
|---------------------------|------------------------|-----------------------|
| CD13-PE                   | BD Biosciences, 555392 | Mouse IgG1-PE         |
| CD29-PE                   | BD Biosciences, 555443 | Mouse IgG1-PE         |
| CD34-PE                   | BD Biosciences, 345802 | Mouse IgG1-PE         |
| CD44-PE                   | BD Biosciences, 555479 | Mouse IgG2b-PE        |
| CD45-PE                   | BD Biosciences, 555483 | Mouse IgG1-PE         |
| CD56-AF647                | BD Biosciences, 562413 | Mouse IgG1-AF647      |
| CD73-PE                   | BD Biosciences, 550257 | Mouse IgG1-PE         |
| CD90-PE                   | BD Biosciences, 555596 | Mouse IgG1-PE         |
| CD105-PE                  | BD Biosciences, 560839 | Mouse IgG1-PE         |
| CD140b-PE                 | BD Biosciences, 558821 | Mouse IgG2a-PE        |
| CD144-PE                  | BD Biosciences, 560410 | Mouse IgG1-PE         |
| CD146-PE-Cy7              | BD Biosciences, 562135 | Mouse IgG1-PE-Cy7     |
| Mouse IgG1 control-PE     | BD Biosciences, 555749 | N/A                   |
| Mouse IgG2b control-PE    | BD Biosciences, 555743 | N/A                   |
| Mouse IgG1 control-PE     | BD Biosciences, 557714 | N/A                   |
| Mouse IgG1 control-PE-Cy7 | BD Biosciences, 557872 | N/A                   |
| Mouse IgG2a control-PE    | R&D Systems, IC003P    | N/A                   |
