# Supplementary material for: Human serum and platelet lysate are appropriate xeno-free alternatives for clinical-grade production of human MuStem cell batches
Source: PubMed Central journal article supplement (PMC5932844; doi:10.1186/s13287-018-0852-y), 2018-05-02
Supplement: 13287_2018_852_MOESM2_ESM.pdf [file 13287_2018_852_MOESM2_ESM.pdf]

**Table S2. List of antibodies used for hMuStem cell characterization by immunocytochemistry analysis**

| Primary antibody | Compagny and reference | Dilution | Incubation time and temperature | Secondary antibody |
|------------------|------------------------|----------|---------------------------------|--------------------|
| MYF5             | Abcam, Ab125078        | 1:200    | 60 min, 37°C                    | GAR Alexa 488      |
| MYOD             | Dako, M3512            | 1:10     | 60 min, 37°C                    | GAM Alexa 488      |
| MYOGENIN         | DSHB, F5D              | 1:10     | 60 min, 37°C                    | GAM Alexa 488      |
| DESMIN           | Dako, M0706            | 1:50     | 60 min, RT                      | GAM Alexa 488      |
| sMyHC            | DSHB, MF20             | 1:500    | 60 min, 37°C                    | GAM Alexa 488      |
| LAMIN A/C        | Abcam, Ab108595        | 1:250    | 60 min, 37°C                    | GAR Alexa 550      |
