# Supplementary material for: Human serum and platelet lysate are appropriate xeno-free alternatives for clinical-grade production of human MuStem cell batches
Source: PubMed Central journal article supplement (PMC5932844; doi:10.1186/s13287-018-0852-y), 2018-05-02
Supplement: 13287_2018_852_MOESM3_ESM.pdf [file 13287_2018_852_MOESM3_ESM.pdf]

**Table S3. List of primers used for RT-qPCR analysis**

| Gene symbol  | Type              |     | Sequence                    | Product (bp) | Accession number |
|--------------|-------------------|-----|-----------------------------|--------------|------------------|
| <i>RPS18</i> | Housekeeping gene | For | 5'-ACCAAGAGGGCGGGAGAA-3'    | 85           | NM_022551.2      |
|              |                   | Rev | 5'-CTGGGATCTTGTACTGGCGTG-3' |              |                  |
| <i>MYF5</i>  |                   | For | 5'-CCACGACCAACCCCAACCA-3'   | 122          | NM_005593.2      |
|              |                   | Rev | 5'-TCCCGGCAGGCTATAGTAGT-3'  |              |                  |
| <i>MYOD1</i> | Myogenic genes    | For | 5'-TTGCCACAACGGACGACT-3'    | 120          | NM_002478.4      |
|              |                   | Rev | 5'-AGTGCTCTTCGGGTTTCAGG-3'  |              |                  |
| <i>DES</i>   |                   | For | 5'-TCCAGTCCTACACCTGCGAGA-3' | 214          | NM_001927.3      |
|              |                   | Rev | 5'-TCCAGGGCCATCTTCACGTT-3'  |              |                  |
| <i>PPARG</i> | Adipogenic gene   | For | 5'-ACTTCTCCAGCATTCTACTCC-3' | 217          | NM_138712.3      |
|              |                   | Rev | 5'-ACACGACATTCAATTGCCAT-3'  |              |                  |
| <i>IBSP</i>  | Osteogenic gene   | For | Proprietary information     | 88           | qHSACED0002933   |
|              |                   | Rev | Proprietary information     |              |                  |
