# Supplementary material for: Human serum and platelet lysate are appropriate xeno-free alternatives for clinical-grade production of human MuStem cell batches
Source: PubMed Central journal article supplement (PMC5932844; doi:10.1186/s13287-018-0852-y), 2018-05-02
Supplement: 13287_2018_852_MOESM4_ESM.pdf [file 13287_2018_852_MOESM4_ESM.pdf]

*Table S4. Growth factor concentrations*

|              | bFGF (pg/mL) |      | IGF-1 (ng/mL) |     | EGF (pg/mL) |       | HGF (pg/mL) |      |
|--------------|--------------|------|---------------|-----|-------------|-------|-------------|------|
|              | mean         | SD   | mean          | SD  | mean        | SD    | mean        | SD   |
| hPL batch #1 | 163.2        | 10.1 | 108.3         | 2.1 | 2051.6      | 173.7 | 1113.5      | 11.9 |
| hPL batch #2 | 163.0        | 5.9  | 131.6         | 6.3 | 1990.8      | 60.1  | 1094.6      | 27.8 |
| HS batch #1  | 13.8         | 1.8  | 139.3         | 4.0 | 1016.9      | 18.6  | 1264.7      | 22.3 |
| HS batch #2  | 14.5         | 0.7  | 124.2         | 6.3 | 1167.1      | 62.5  | 1384.6      | 46.5 |
