# Supplementary material for: Human serum and platelet lysate are appropriate xeno-free alternatives for clinical-grade production of human MuStem cell batches
Source: PubMed Central journal article supplement (PMC5932844; doi:10.1186/s13287-018-0852-y), 2018-05-02

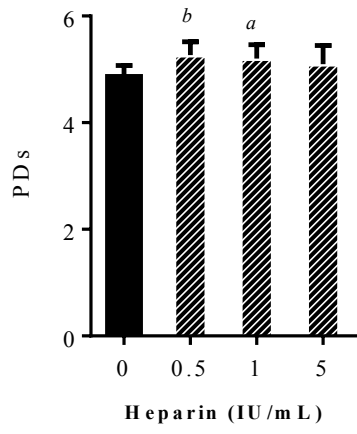

Supplement: 13287_2018_852_MOESM6_ESM.pdf [file 13287_2018_852_MOESM6_ESM.pdf]
